# Supplementary material for: End of treatment cone-beam computed tomography (CBCT) is predictive of radiation response and overall survival in oropharyngeal squamous cell carcinoma
Source: Springer Nature journal article supplement (doi:10.1186/s13014-021-01871-w), 2021-08-09

# Supp Figure 1

## A

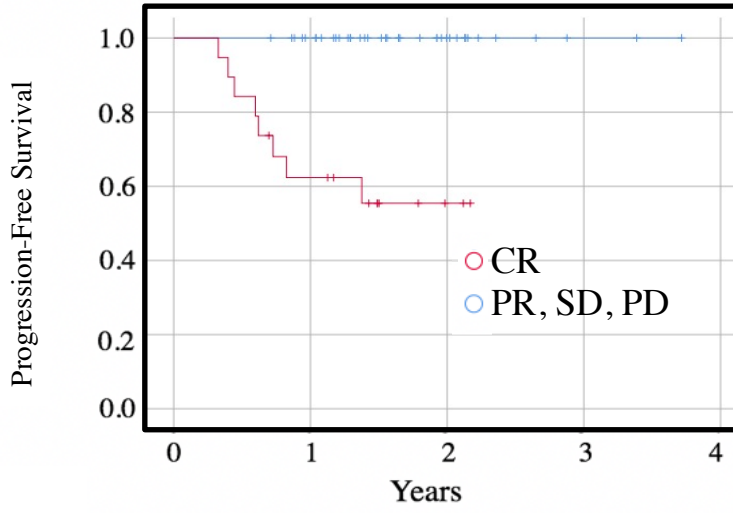

Supplement: MOESM1 [file 19554600]
